# Supplementary material
Source: PubMed Central journal article supplement (PMC7531999)

## Supplementary data:

### Table 1: Inclusion and exclusion criteria for the phase I Lenzilumab CMML clinical trial

**Subject Population** Subjects with CMML who have relapsed, or were refractory and/or intolerant to prior treatment with an HMA, HU, other standard of care treatment, or investigational agent for the management of CMML. The diagnosis of CMML must be confirmed according to WHO criteria.

#### Inclusion Criteria

1. Confirmed diagnosis of CMML using the WHO criteria.
2. Subjects with CMML who have relapsed, or were refractory and/or intolerant to prior treatment with an HMA, HU, other standard of care treatment, or to an investigational agent used for the management of CMML (front line or salvage setting). Patients who were deemed to be ineligible for therapy with HMA and/or HU were also allowed enrollment.
3. Age  $\geq 18$  years.
4. Eastern Cooperative Oncology Group (ECOG) performance status of  $\leq 2$ .
5. Must be able and willing to provide adequate bone marrow aspirate and biopsy specimens suitable for histopathological analysis and standard cytogenetic analysis.
  - If prior bone marrow sample was obtained  $< 90$  days from Cycle 1 Day 1 and patient has not had therapy directed for CMML, with the exception of HU, within this time period, a repeat bone marrow sample at screening may not be required after discussion with the Sponsor's medical monitor
6. Must have the following local laboratory results:
  - Platelet count  $\geq 20,000/\mu\text{L}$
  - Absolute neutrophil count (ANC)  $\geq 500/\mu\text{L}$
  - Liver function (total bilirubin  $\leq 1.5^* \times$  upper limit of normal [ULN], aspartate aminotransferase [AST] and/or alanine aminotransferase [ALT]  $\leq 3 \times$  ULN)
    - For subjects with hepatomegaly due to extramedullary hematopoiesis, AST and/or ALT  $< 5 \times$  ULN
    - \*For subjects with total bilirubin  $> 1.5 \times$  ULN, direct bilirubin  $\leq$  ULN
  - Kidney function (serum creatinine  $< 2$  mg/dL or creatinine clearance  $> 30$  mL/min)
7. Male subjects and female subjects of childbearing potential must agree to use adequate contraception (hormonal or barrier method of birth control, abstinence) prior to study entry and for 8 weeks following their last dose of study drug. A negative serum beta human chorionic gonadotropin ( $\beta$ -hCG) is required for all female subjects of childbearing potential within 1 week prior to receiving first dose of study drug.
8. Ability to understand the requirements of the study and informed consent. A signed informed consent by the subject or a legally authorized representative is required prior to enrollment in this study.

#### Exclusion Criteria

1. MDS/MPN unclassifiable syndromes other than CMML, as assessed by the investigator.
2. Known or suspected hypersensitivity to KB003 or components of the KB003 formulation.

3. Use of approved or experimental agents for the treatment of CMML (with the exception of HU) or radiotherapy within approximately 14 days (or within 5 half-lives of agent, whichever is longer) prior to Cycle 1 Day 1. Subjects must have recovered from the toxic effects of that therapy to  $\leq$  Grade 1 or baseline grade. HU may be given during the first 14 days of Cycle 1 only; longer usage of HU during Cycle 1 must be approved by KaloBios.
4. Concurrent use of administered hGM-CSF (sargramostim) or GCSF administration within 7 days of screening hematology laboratory tests.
5. Pregnant or breastfeeding female subjects.
6. Known HIV infection (screening test not required).
7. History of other malignancy within the last 2 years. Basal or squamous cell skin carcinomas adequately treated are allowed. Subjects with a history of low-grade localized prostate cancer will be eligible even if diagnosed  $<2$  years previously.
9. Uncontrolled inter-current illness including but not limited to ongoing or active infection, symptomatic congestive heart failure, unstable angina pectoris, cardiac arrhythmia, or psychiatric illness/social situations that would limit compliance with study requirements.
10. Pulmonary alveolar proteinosis (PAP) or history of PAP (see Section 8.5).
11. Hypoxemia at screening (oxygen saturation at room air  $<92\%$ ).
12. Inability to give consent or unwillingness or inability to comply with study procedures.
13. Any other reason that in the opinion of the Investigator would prevent the subject from completing participation or following the study schedule.

**Table 2- Baseline Patient Characteristics**

| <b>Baseline Characteristics</b>                  | <b>Phase 1 (n=15)</b> |
|--------------------------------------------------|-----------------------|
| <b>Median Age (range)</b>                        | 74 (52-85)            |
| <b>Male (%)</b>                                  | 12 (80%)              |
| <b>FAB Classification</b>                        |                       |
| <b>MPN-CMML (%)</b>                              | 10 (66%)              |
| <b>MDS-CMML (%)</b>                              | 5 (33%)               |
| <b>WHO Classification</b>                        |                       |
| <b>CMML-0 (%)</b>                                | 9 (60%)               |
| <b>CMML-1 (%)</b>                                | 3 (20%)               |
| <b>CMML-2 (%)</b>                                | 3 (20%)               |
| <b>Cytogenetics</b>                              |                       |
| <b>Normal or -Y (%)</b>                          | 11 (73%)              |
| <b>High (%)</b>                                  | 23 (27%)              |
| <b>Prior Treatment overall</b>                   | 12 (80%)              |
| <b>HMA</b>                                       | 9 (60%)               |
| <b>Hydroxyurea</b>                               | 3 (20%)               |
| <b>Palpable Splenomegaly (%)</b>                 | 8 (53%)               |
| <b>Median WBC x 10<sup>3</sup>/dL (range)</b>    | 10 (3-59.8)           |
| <b>Median AMC x10<sup>3</sup>/dL (range)</b>     | 4.5 (1.3-10)          |
| <b>Median HGB g/dL (range)</b>                   | 9.7 (7.6-14)          |
| <b>Median PLT x10<sup>3</sup>/dL (range)</b>     | 147 (16-942)          |
| <b>Median Bone Marrow Percent Blasts (range)</b> | 5.1 (0-17)            |

**Table 3. Table showing clinical and genetic information chronic myelocytic leukemia patients enrolled in the KB003 clinical trial.**

| <b>Pt. No.</b> | <b>Hb (gm/dL)</b> | <b>WBC (<math>\times 10^9/L</math>)</b> | <b>AMC (<math>\times 10^9/L</math>)</b> | <b>Platelet count (<math>\times 10^9/L</math>)</b> | <b>PB blast%</b> | <b>BM blast %</b> | <b>LDH (U/L)</b> | <b>Splenomegaly (yes or no)</b> | <b>ECOG PS</b> |
|----------------|-------------------|-----------------------------------------|-----------------------------------------|----------------------------------------------------|------------------|-------------------|------------------|---------------------------------|----------------|
| 1              | 9.4               | 18.5                                    | 4.4                                     | 191                                                | 3                | 6                 | 155              | Yes                             | 1              |
| 2              | 8.2               | 25.2                                    | 18.6                                    | 249                                                | 0                | 0                 | 133              | No                              | 1              |
| 3              | 10                | 5.4                                     | 1.9                                     | 62                                                 | 0                | 4                 | 245              | No                              | 1              |
| 4              | 9.2               | 18.6                                    | 1.3                                     | 45                                                 | 0                | 3                 | 214              | No                              | 1              |
| 5              | 10.9              | 24.1                                    | 6.8                                     | 77                                                 | 0                | 1                 | 167              | Yes                             | 1              |
| 6              | 8.9               | 3                                       | 0.4                                     | 16                                                 | 0                | 1                 | 118              | No                              | 0              |
| 7              | 9                 | 55.8                                    | 10                                      | 133                                                | 0                | 1                 | 193              | No                              | 1              |
| 8              | 11.9              | 55                                      | 8.3                                     | 48                                                 | 1                | 3                 | 696              | Yes                             | 1              |
| 9              | 8.8               | 43.1                                    | 9.9                                     | 25                                                 | 14               | 15                | 346              | Yes                             | 2              |
| 10             | 10.2              | 11.8                                    | 2.7                                     | 50                                                 | 8                | 17                | 178              | Yes                             | 2              |
| 11             | 14                | 59.8                                    | 9                                       | 66                                                 | 0                | 6                 | 317              | No                              | 0              |
| 12             | 8.7               | 9.1                                     | 12                                      | 218                                                | 0                | 0.2               | 381              | Yes                             | 1              |
| 13             | 7.6               | 17.2                                    | 4.8                                     | 53                                                 | 5                | 10                | 104              | Yes                             | 1              |
| 14             | 10.3              | 2.9                                     | 1.3                                     | 35                                                 | 0                | 6                 | 327              | No                              | 1              |
| 15             | 9                 | 20                                      | 2.2                                     | 942                                                | 0                | 3                 | 226              | Yes                             | 1              |

**Abbreviations:** Hb=Hemoglobin; WBC=White blood cell count; AMC=absolute monocyte count; PB=peripheral blood; BM=bone marrow; LDH=lactate dehydrogenase; ECOG PS=Eastern cooperative group performance status.

**Table 4. Summary of best responses**

| <b>Best Response</b>                     | <b>Phase 1 (n=15)</b> |
|------------------------------------------|-----------------------|
| <b>Complete Response</b>                 | 0                     |
| <b>Partial Response</b>                  | 0                     |
| <b>Optimal Marrow Response</b>           | 0                     |
| <b>Partial Marrow Response</b>           | 1                     |
| <b>Clinical Benefit (total patients)</b> | <b>4</b>              |
| <b>Erythroid</b>                         | 0                     |
| <b>Platelet</b>                          | 3                     |
| <b>Spleen</b>                            | 0                     |
| <b>Neutrophil</b>                        | 1                     |
| <b>Stable Disease</b>                    | 5                     |
| <b>Progressive Disease</b>               | 5                     |
| <b>Overall Response Rate</b>             | 5 (33.33%)            |

Figure 1- Phase 1 study of lenzilumab in CMML patients: clinical trial schema

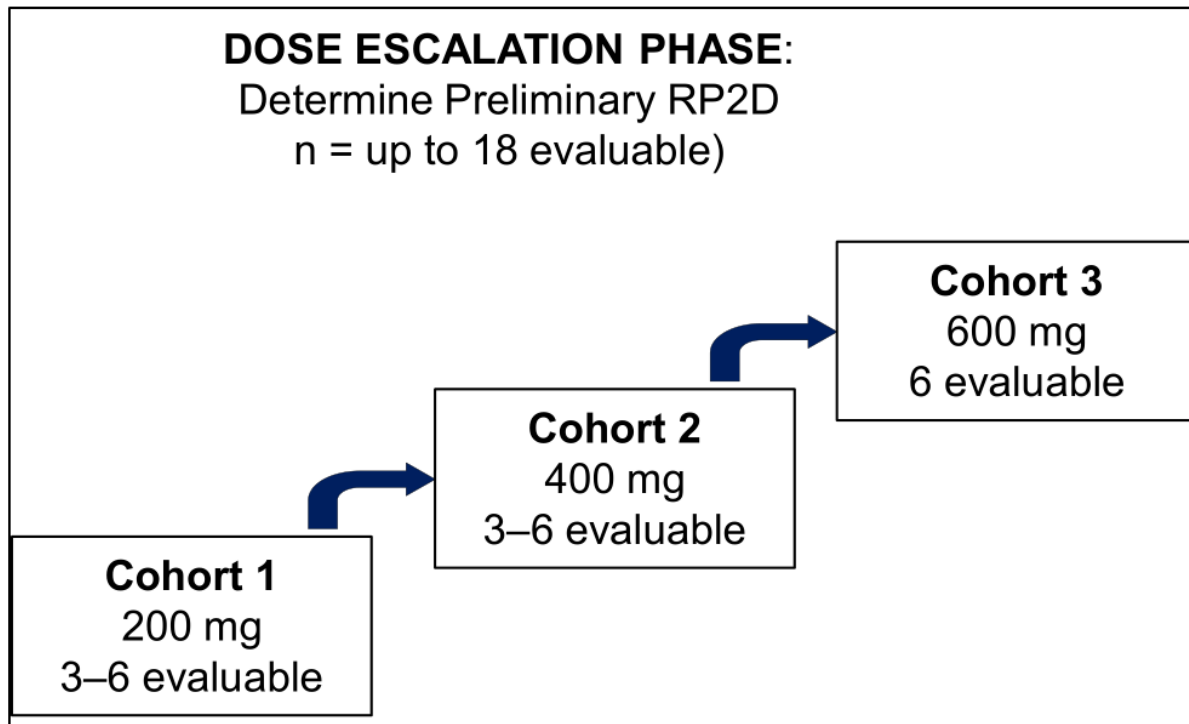

**Notes:**

- KB003 will be administered by IV infusion as part of a 28-day dosing cycle, with an additional (loading) dose on Day15 of Cycle 1.
- In each cohort, safety will be assessed at the end of Cycle 1 before enrolling the next cohort

## Study Schedule of Events

|                                          | Screening<br>(D -28 to 0) | Cycle 1                   |              |              |                | Cycle 2                   |               | Cycle 3+                  | EOT<br>(~4 wk after<br>last dose) | EOS/Follow-up<br>(~8 wk after<br>last dose) <sup>c</sup> |
|------------------------------------------|---------------------------|---------------------------|--------------|--------------|----------------|---------------------------|---------------|---------------------------|-----------------------------------|----------------------------------------------------------|
|                                          |                           | D1 <sup>a</sup><br>(±0 d) | D2<br>(±0 d) | D8<br>(±1 d) | D15<br>(±3 d)  | D1 <sup>a</sup><br>(±3 d) | D15<br>(±3 d) | D1 <sup>b</sup><br>(±7 d) |                                   |                                                          |
| PK (KB003 serum concentration)           |                           | X <sup>e</sup>            | X            | X            | X <sup>e</sup> | X <sup>e</sup>            | X             | X <sup>e</sup>            | X                                 |                                                          |
| Disease response assessment <sup>f</sup> |                           |                           |              |              |                | X                         |               | X                         | X                                 |                                                          |
| Symptom assessment                       | X                         | X                         |              |              |                | X                         |               | X                         | X                                 |                                                          |
| Adverse events <sup>d</sup>              |                           | X                         | X            | X            | X              | X                         | X             | X                         | X                                 | X <sup>g</sup>                                           |
| Assess for DLT                           |                           | X                         | X            | X            | X              | X                         | X             |                           |                                   |                                                          |
| Survival follow-up                       |                           |                           |              |              |                |                           |               |                           |                                   | x                                                        |

### Footnotes

- a **Cycle 1 Day 1 column: (C1D1):** is defined as the day of the first dose of study drug.
- b **C3D1 column:** Procedures noted in this column to be performed on C3D1 and D1 of every cycle thereafter (C4D1, C5D1, etc.) unless footnoted otherwise.
- c **Survival:** Patients will be followed for survival for duration of the study.
- d **Medical history:** Events or conditions prior to infusion on C1D1 are considered medical history unless the reportable event is the result of a protocol-mandated study procedure. Events or conditions resulting from protocol-mandated study procedures should be recorded as AEs.
- e **PK:** Samples collected preinfusion, end of infusion, and approximately 1 hour following the end of infusion on C1D1, then preinfusion only at subsequent visits. An unscheduled sample may be taken in the event of suspected KB003-related toxicity.
- f **Disease response assessment:** Assessment includes results from peripheral blood, bone marrow, and cytogenetic findings; spleen assessment; TI; and symptoms.
- g **Follow-up AEs/SAEs:** Follow-up for related AEs/SAEs only and for survival information up to 8 weeks after the last dose of study drug or until the start of new treatment, whichever comes first. Report events during the follow-up period as AEs/SAEs only if deemed related to KB003.

Figure 2: Violin plots demonstrating pSTAT5 by flow cytometry in CMML patients enrolled in the lenzolumab clinical trial, with samples being obtained at screening and at cycle 3 of therapy, showing no significant differences between responders and non-responders.

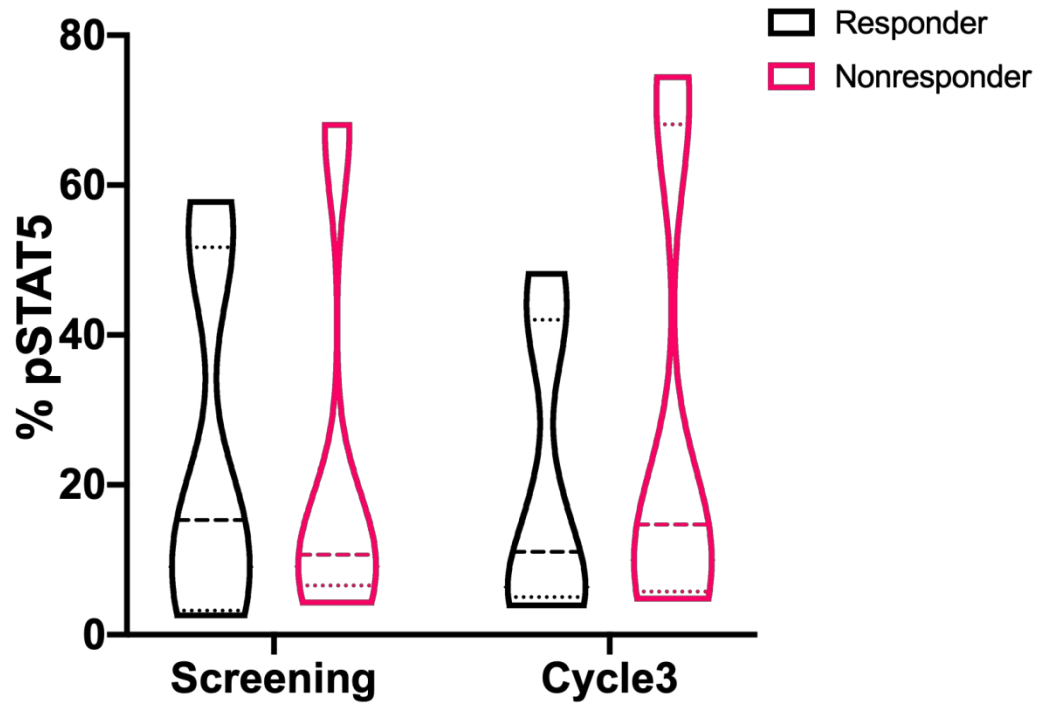



**Figure 3 - Variant allele frequencies of individual patients. (pages 10-37)**

# KB-1-001

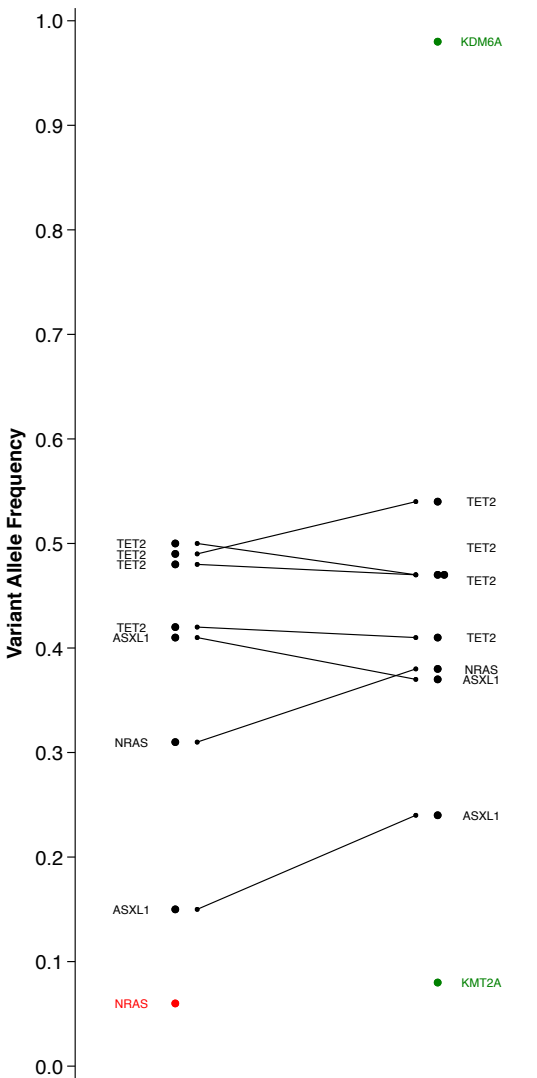

# KB-4-001

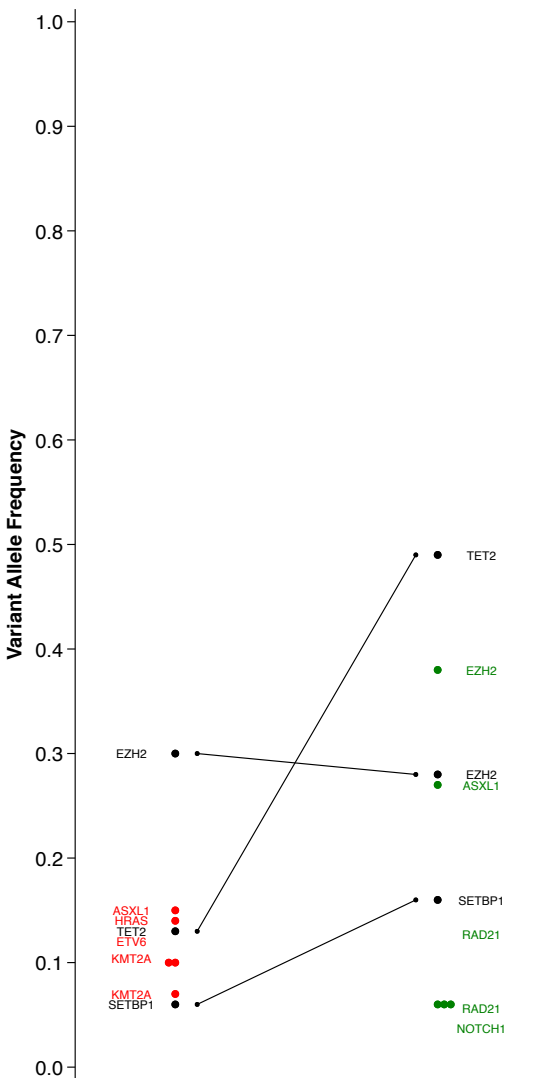

# KB-5-001

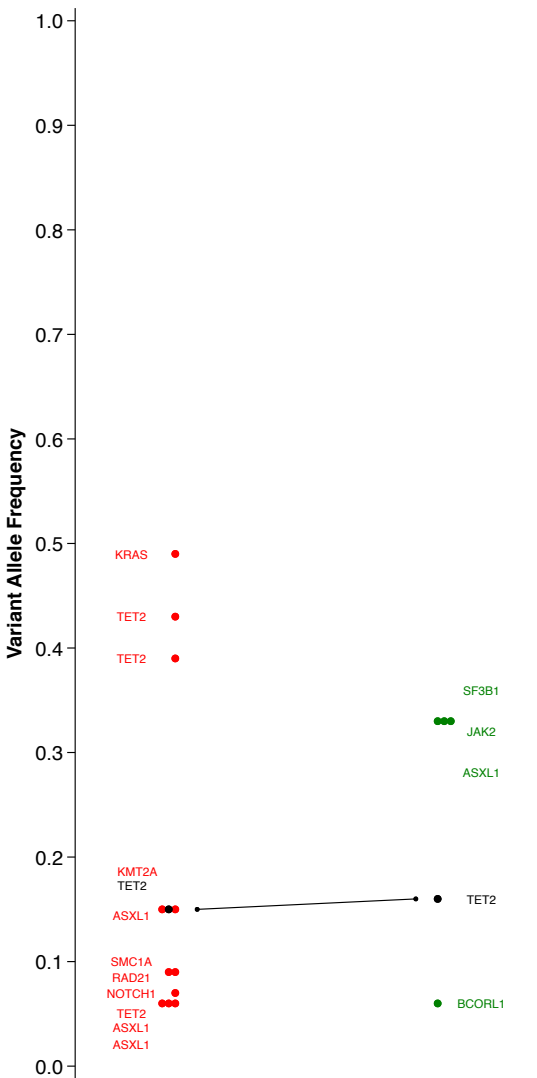

# KB-6-001

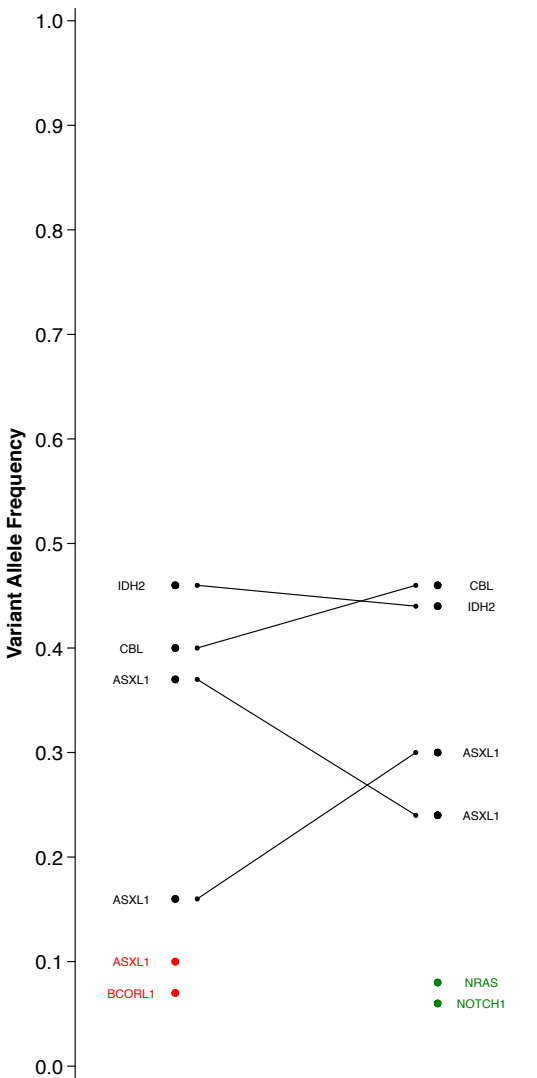

# KB-7-001

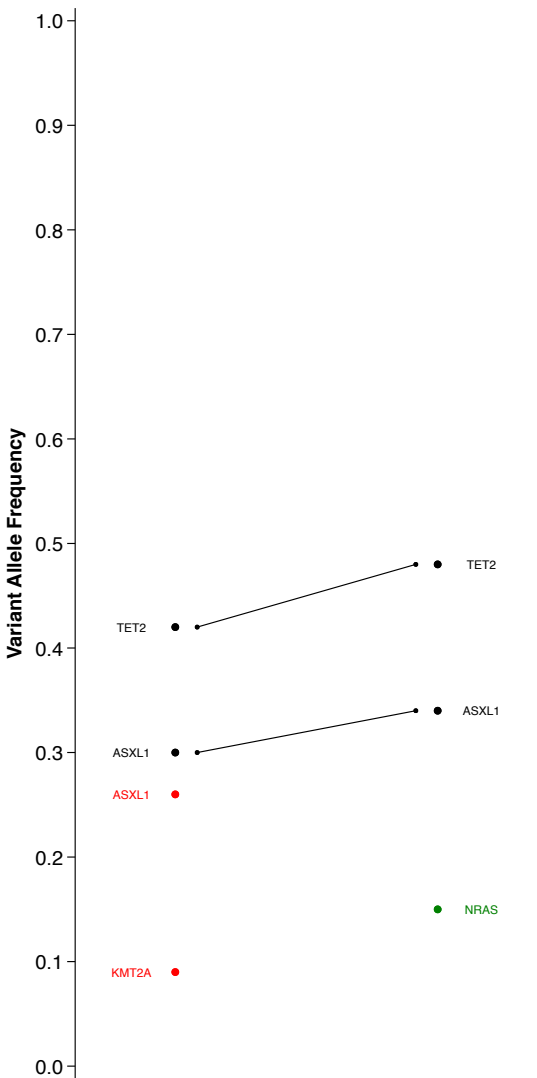

# KB-8-001

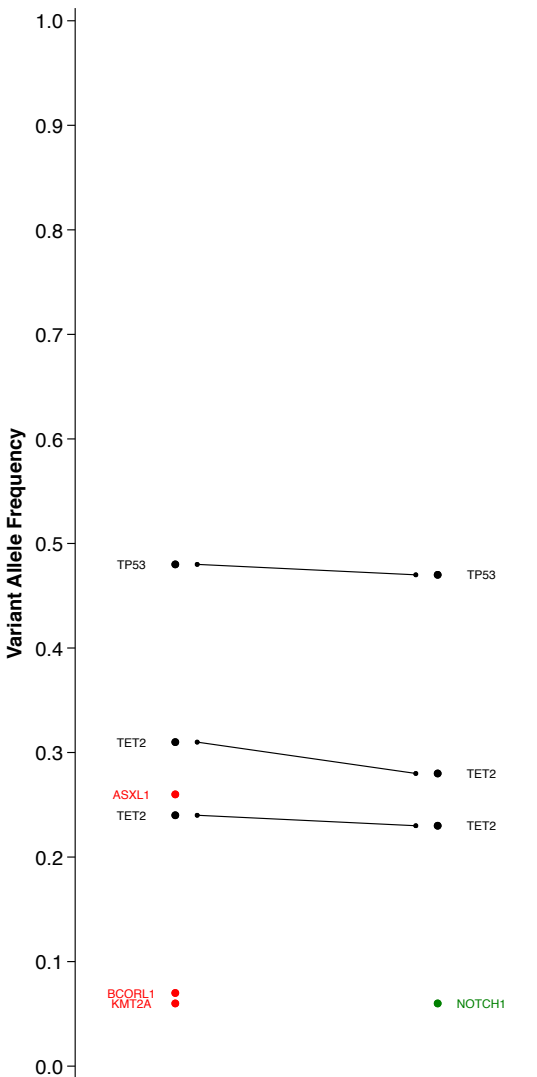

# KB-10-001

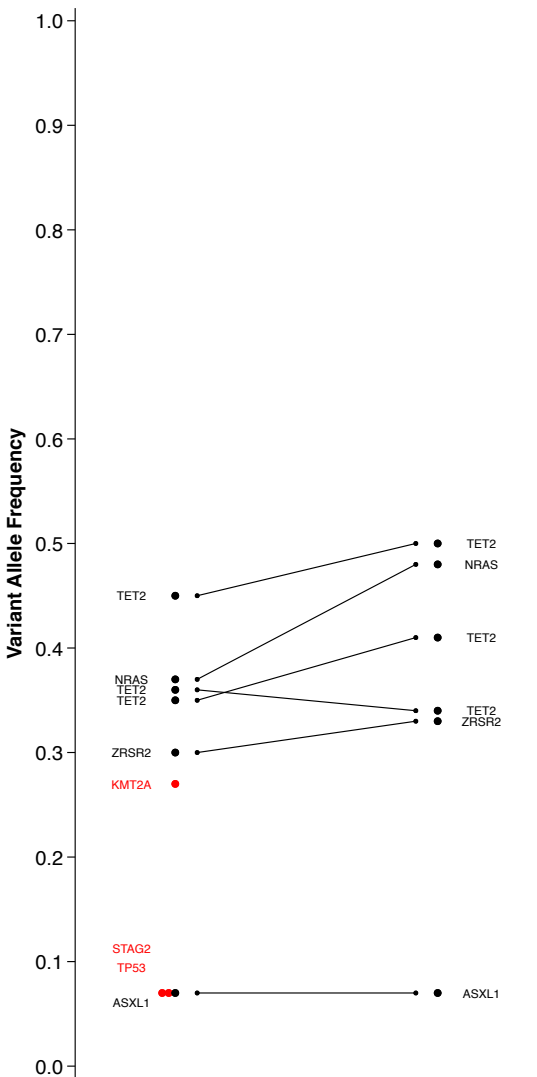



# KB-12-001

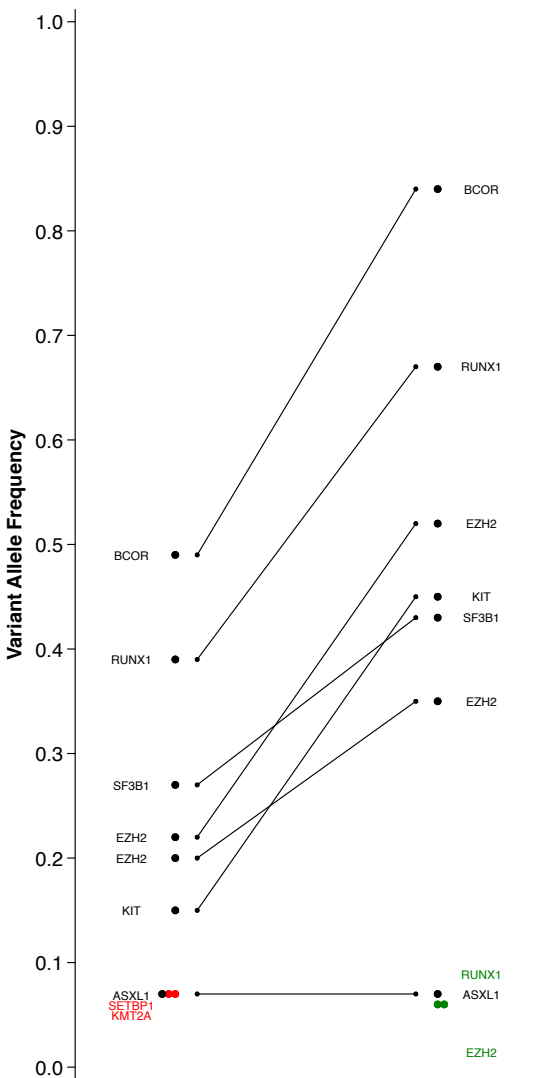

# KB-13-001

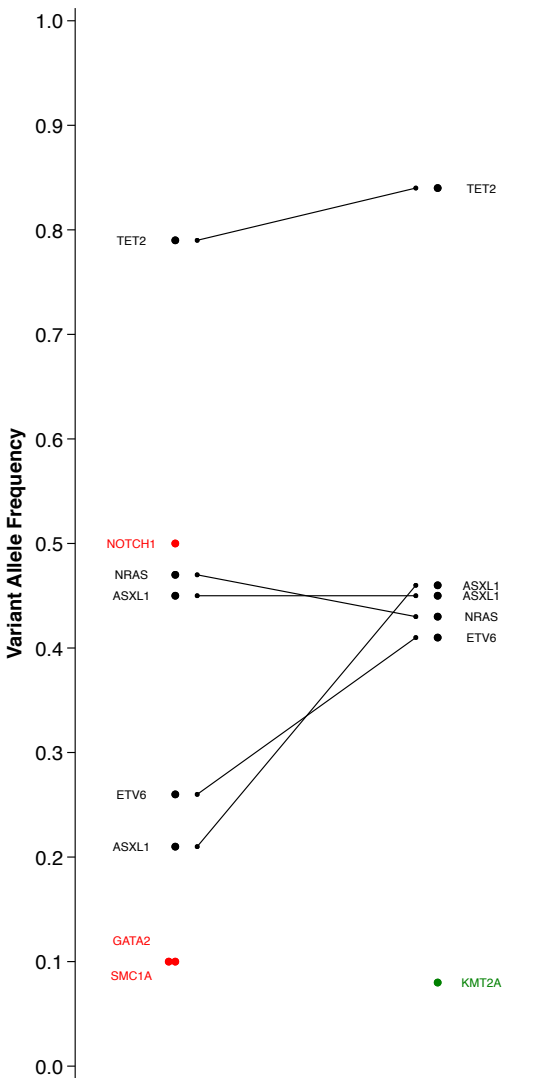

# KB-14-001

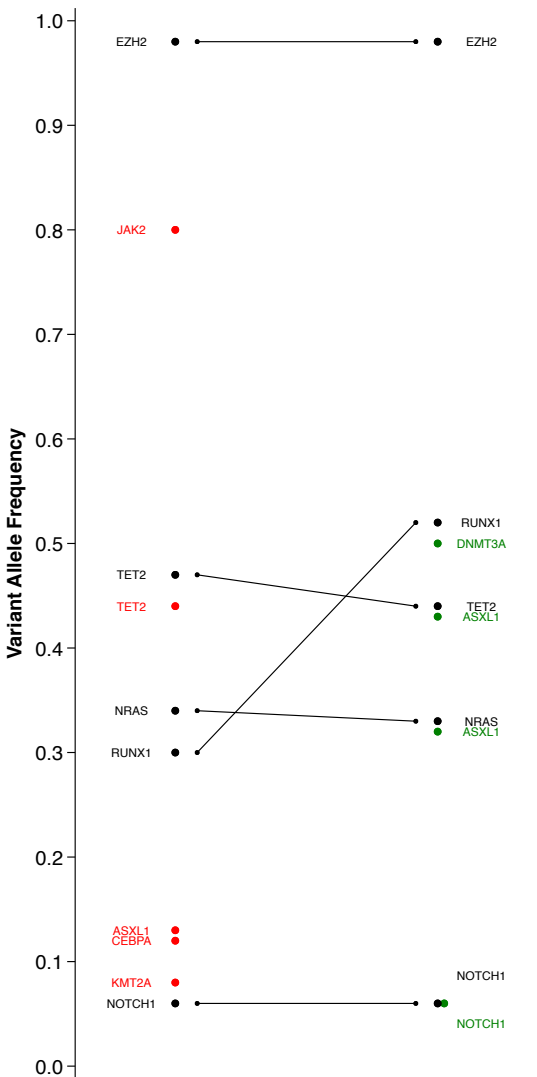

## Raindance Paired VAF Analysis

Orange samples in paired patient samples indicate variants found both in screening and post-treatment samples.

### PAIRED TIMEPOINT SAMPLES

#### NON-RESPONDERS:

**KB-6-001 (103-001)**

*Screening ("RainC")*

| GENE   | AF   | TYPE                 | CHR | START     | END       |
|--------|------|----------------------|-----|-----------|-----------|
| CBL    | 0.40 | nonsynonymous SNV    | 11  | 119278535 | 119278535 |
| IDH2   | 0.46 | nonsynonymous SNV    | 15  | 90088702  | 90088702  |
| ASXL1  | 0.16 | frameshift insertion | 20  | 32434640  | 32434640  |
| ASXL1  | 0.37 | nonsynonymous SNV    | 20  | 32435156  | 32435156  |
| ASXL1  | 0.10 | frameshift deletion  | 20  | 32435578  | 32435581  |
| BCORL1 | 0.07 | nonsynonymous SNV    | X   | 130014637 | 130014637 |

*C3D1 Treated ("Rain5")*

| GENE   | AF   | TYPE                 | Chr | Start     | End       |
|--------|------|----------------------|-----|-----------|-----------|
| NRAS   | 0.08 | nonsynonymous SNV    | 1   | 114716127 | 114716127 |
| CBL    | 0.46 | nonsynonymous SNV    | 11  | 119278535 | 119278535 |
| IDH2   | 0.44 | nonsynonymous SNV    | 15  | 90088702  | 90088702  |
| ASXL1  | 0.30 | frameshift insertion | 20  | 32434640  | 32434640  |
| ASXL1  | 0.24 | nonsynonymous SNV    | 20  | 32435156  | 32435156  |
| NOTCH1 | 0.06 | nonsynonymous SNV    | 9   | 136496655 | 136496655 |

*Changes in AF of mutations in both samples:*

CBL: increase AF by 0.06 after treatment

IDH2: decrease AF by 0.02 after treatment

ASXL1 (FSI): increase AF by 0.14 after treatment

ASXL1 (NS): decrease AF by 0.13 after treatment

*Differences:*

Lost ASXL1 frameshift deletion and BCORL1 nonsynonymous SNV mutations after treatment.

Gain NRAS and NOTCH1 nonsynonymous SNV mutations after treatment.

## Raindance Paired VAF Analysis

KB-7-001 (103-003)

Screening ("RainE")

| GENE  | AF   | TYPE                 | CHR | START     | END       |
|-------|------|----------------------|-----|-----------|-----------|
| KMT2A | 0.09 | nonsynonymous SNV    | 11  | 118472267 | 118472267 |
| ASXL1 | 0.30 | frameshift insertion | 20  | 32434639  | 32434639  |
| ASXL1 | 0.26 | nonsynonymous SNV    | 20  | 32435156  | 32435156  |
| TET2  | 0.42 | frameshift deletion  | 4   | 105236290 | 105236290 |

C3D1 Treated ("Rain6")

| GENE  | AF   | TYPE                 | CHR | START     | END       |
|-------|------|----------------------|-----|-----------|-----------|
| NRAS  | 0.15 | nonsynonymous SNV    | 1   | 114716126 | 114716126 |
| ASXL1 | 0.34 | frameshift insertion | 20  | 32434639  | 32434639  |
| TET2  | 0.48 | frameshift deletion  | 4   | 105236290 | 105236290 |

*Changes in AF of mutations in both samples:*

ASXL1 (FSI): increase AF by 0.04 after treatment

TET2 (FSD): increase AF by 0.06 after treatment

*Differences:*

Lost KMT2A and ASXL1 nonsynonymous SNV mutations after treatment.

Gain KRAS nonsynonymous SNV mutation after treatment.

## Raindance Paired VAF Analysis

KB-10-001 (103-007)

Screening ("RainG")

| GENE  | AF   | TYPE                    | CHR | START     | END       |
|-------|------|-------------------------|-----|-----------|-----------|
| NRAS  | 0.37 | nonsynonymous SNV       | 1   | 114716126 | 114716126 |
| KMT2A | 0.27 | nonsynonymous SNV       | 11  | 118472267 | 118472267 |
| TP53  | 0.07 | nonsynonymous SNV       | 17  | 7676193   | 7676193   |
| ASXL1 | 0.07 | stopgain                | 20  | 32434789  | 32434789  |
| TET2  | 0.36 | frameshift insertion    | 4   | 105235432 | 105235432 |
| TET2  | 0.45 | frameshift deletion     | 4   | 105237004 | 105237004 |
| TET2  | 0.35 | nonsynonymous SNV       | 4   | 105275613 | 105275613 |
| ZRSR2 | 0.30 | nonframeshift insertion | X   | 15823113  | 15823113  |
| STAG2 | 0.07 | nonsynonymous SNV       | X   | 124051210 | 124051210 |

C3D1 Treated ("Rain9")

| GENE  | AF   | TYPE                    | CHR | START     | END       |
|-------|------|-------------------------|-----|-----------|-----------|
| NRAS  | 0.48 | nonsynonymous SNV       | 1   | 114716126 | 114716126 |
| ASXL1 | 0.07 | stopgain                | 20  | 32434789  | 32434789  |
| TET2  | 0.34 | frameshift insertion    | 4   | 105235432 | 105235432 |
| TET2  | 0.50 | frameshift deletion     | 4   | 105237004 | 105237004 |
| TET2  | 0.41 | nonsynonymous SNV       | 4   | 105275613 | 105275613 |
| ZRSR2 | 0.33 | nonframeshift insertion | X   | 15823113  | 15823113  |

*Changes in AF of mutations in both samples:*

NRAS: increase AF by 0.11 after treatment  
 ASXL1: no change in AF after treatment  
 TET2 (FSI): increase AF by 0.02 after treatment  
 TET2 (FSD): increase AF by 0.05 after treatment  
 TET2 (NS): increase AF by 0.06 after treatment  
 ZRSR2: increase AF by 0.03 after treatment

*Differences:*

Lost KMT2A, TP53, and STAG2 nonsynonymous SNV mutations after treatment.

## Raindance Paired VAF Analysis

KB-12-001 (103-009)

Screening ("RainI")

| GENE   | AF   | TYPE                 | CHR | START     | END       |
|--------|------|----------------------|-----|-----------|-----------|
| KMT2A  | 0.07 | nonsynonymous SNV    | 11  | 118472267 | 118472267 |
| SETBP1 | 0.07 | nonsynonymous SNV    | 18  | 44951793  | 44951793  |
| SF3B1  | 0.27 | nonsynonymous SNV    | 2   | 197402110 | 197402110 |
| ASXL1  | 0.07 | frameshift deletion  | 20  | 32435305  | 32435305  |
| RUNX1  | 0.39 | nonsynonymous SNV    | 21  | 34834505  | 34834505  |
| KIT    | 0.15 | nonsynonymous SNV    | 4   | 54733155  | 54733155  |
| EZH2   | 0.22 | frameshift insertion | 7   | 148815519 | 148815519 |
| EZH2   | 0.20 | frameshift deletion  | 7   | 148816719 | 148816720 |
| BCOR   | 0.49 | frameshift insertion | X   | 40062943  | 40062943  |

C3D1 Treated ("Rain10")

| GENE  | AF   | TYPE                 | CHR | START     | END       |
|-------|------|----------------------|-----|-----------|-----------|
| SF3B1 | 0.43 | nonsynonymous SNV    | 2   | 197402110 | 197402110 |
| ASXL1 | 0.07 | frameshift deletion  | 20  | 32435305  | 32435305  |
| RUNX1 | 0.67 | nonsynonymous SNV    | 21  | 34834505  | 34834505  |
| RUNX1 | 0.06 | nonsynonymous SNV    | 21  | 34886895  | 34886895  |
| KIT   | 0.45 | nonsynonymous SNV    | 4   | 54733155  | 54733155  |
| EZH2  | 0.52 | frameshift insertion | 7   | 148815519 | 148815519 |
| EZH2  | 0.35 | frameshift deletion  | 7   | 148816719 | 148816720 |
| EZH2  | 0.06 | nonsynonymous SNV    | 7   | 148817266 | 148817266 |
| BCOR  | 0.84 | frameshift insertion | X   | 40062943  | 40062943  |

*Changes in AF of mutations in both samples:*

SF3B1: increase AF by 0.16 after treatment

ASXL1: no change in AF after treatment

RUNX1: increase AF by 0.28 after treatment

KIT: increase AF by 0.30 after treatment

EZH2 (FSI): increase AF by 0.30 after treatment

EZH2 (FSD): increase AF by 0.15 after treatment

BCOR: increase AF by 0.35 after treatment

*Differences:*

Lost KMT2A and SETBP1 nonsynonymous SNV mutations after treatment.

Gain of RUNX1 and EZH2 nonsynonymous SNV mutations after treatment.

## Raindance Paired VAF Analysis

### RESPONDERS:

#### KB-1-001 (101-001)

##### Screening ("RainA")

| GENE  | AF   | TYPE                | CHR | START     | END       |
|-------|------|---------------------|-----|-----------|-----------|
| NRAS  | 0.31 | nonsynonymous SNV   | 1   | 114716126 | 114716126 |
| NRAS  | 0.06 | nonsynonymous SNV   | 1   | 114716127 | 114716127 |
| ASXL1 | 0.41 | nonsynonymous SNV   | 20  | 32435156  | 32435156  |
| ASXL1 | 0.15 | frameshift deletion | 20  | 32436270  | 32436270  |
| TET2  | 0.49 | nonsynonymous SNV   | 4   | 105234686 | 105234686 |
| TET2  | 0.48 | nonsynonymous SNV   | 4   | 105235227 | 105235227 |
| TET2  | 0.50 | frameshift deletion | 4   | 105243683 | 105243683 |
| TET2  | 0.42 | frameshift deletion | 4   | 105259654 | 105259654 |

##### C3D1 Treated ("Rain1")

| GENE  | AF   | TYPE                | CHR | START     | END       |
|-------|------|---------------------|-----|-----------|-----------|
| NRAS  | 0.38 | nonsynonymous SNV   | 1   | 114716126 | 114716126 |
| KMT2A | 0.08 | nonsynonymous SNV   | 11  | 118472267 | 118472267 |
| ASXL1 | 0.37 | nonsynonymous SNV   | 20  | 32435156  | 32435156  |
| ASXL1 | 0.24 | frameshift deletion | 20  | 32436270  | 32436270  |
| TET2  | 0.54 | nonsynonymous SNV   | 4   | 105234686 | 105234686 |
| TET2  | 0.47 | nonsynonymous SNV   | 4   | 105235227 | 105235227 |
| TET2  | 0.47 | frameshift deletion | 4   | 105243683 | 105243683 |
| TET2  | 0.41 | frameshift deletion | 4   | 105259654 | 105259654 |
| KDM6A | 0.98 | nonsynonymous SNV   | X   | 45061396  | 45061396  |

##### *Changes in AF of mutations in both samples:*

NRAS: increase AF by 0.07 after treatment  
 ASXL1 (NS): decrease AF by 0.04 after treatment  
 ASXL1 (FSD): increase AF by 0.09 after treatment  
 TET2 (NS [I]): increase AF by 0.05 after treatment  
 TET2 (NS [II]): decrease AF by 0.01 after treatment  
 TET2 (FSD [I]): decrease AF by 0.03 after treatment  
 TET2 (FSD [II]): decrease AF by 0.01 after treatment

##### *Differences:*

Lost NRAS nonsynonymous SNV mutation after treatment.  
 Gain KMT2A and KDM6A nonsynonymous SNV mutations after treatment.



## Raindance Paired VAF Analysis

KB-4-001 (101-004)

Screening ("10")

| GENE   | AF   | TYPE              | CHR | START     | END       |
|--------|------|-------------------|-----|-----------|-----------|
| HRAS   | 0.14 | nonsynonymous SNV | 11  | 533568    | 533568    |
| KMT2A  | 0.07 | nonsynonymous SNV | 11  | 118472267 | 118472267 |
| KMT2A  | 0.10 | nonsynonymous SNV | 11  | 118503264 | 118503264 |
| ETV6   | 0.10 | nonsynonymous SNV | 12  | 11869562  | 11869562  |
| SETBP1 | 0.06 | nonsynonymous SNV | 18  | 44951942  | 44951942  |
| ASXL1  | 0.15 | nonsynonymous SNV | 20  | 32435156  | 32435156  |
| TET2   | 0.13 | nonsynonymous SNV | 4   | 105237193 | 105237193 |
| EZH2   | 0.30 | nonsynonymous SNV | 7   | 148814090 | 148814090 |

C3D1 Treated ("Rain3")

| GENE   | AF   | TYPE                 | CHR | START     | END       |
|--------|------|----------------------|-----|-----------|-----------|
| SETBP1 | 0.16 | nonsynonymous SNV    | 18  | 44951942  | 44951942  |
| ASXL1  | 0.27 | frameshift insertion | 20  | 32434639  | 32434639  |
| TET2   | 0.49 | nonsynonymous SNV    | 4   | 105237193 | 105237193 |
| EZH2   | 0.38 | nonsynonymous SNV    | 7   | 148809351 | 148809351 |
| EZH2   | 0.28 | nonsynonymous SNV    | 7   | 148814090 | 148814090 |
| RAD21  | 0.06 | frameshift deletion  | 8   | 116847604 | 116847604 |
| RAD21  | 0.06 | frameshift deletion  | 8   | 116847606 | 116847606 |
| NOTCH1 | 0.06 | nonsynonymous SNV    | 9   | 136496655 | 136496655 |

*Changes in AF of mutations in both samples:*

SETBP1: increase AF by 0.10 after treatment

TET2: increase AF by 0.36 after treatment

EZH2: decrease AF by 0.02 after treatment

*Differences:*

Lost HRAS, KMT2A (x2), ETV6, and ASXL1 nonsynonymous SNV mutations after treatment. Gain ASXL1 frameshift insertion, EZH2 and NOTCH1 nonsynonymous SNV mutations, and two RAD21 frameshift deletions after treatment.

## Raindance Paired VAF Analysis

KB-5-001 (101-005)

Screening ("12")

| GENE   | AF   | TYPE                 | CHR | START     | END       |
|--------|------|----------------------|-----|-----------|-----------|
| KMT2A  | 0.15 | nonsynonymous SNV    | 11  | 118472267 | 118472267 |
| KRAS   | 0.49 | nonsynonymous SNV    | 12  | 25245332  | 25245332  |
| ASXL1  | 0.06 | nonsynonymous SNV    | 20  | 32433455  | 32433455  |
| ASXL1  | 0.06 | nonsynonymous SNV    | 20  | 32433457  | 32433457  |
| ASXL1  | 0.15 | frameshift insertion | 20  | 32434639  | 32434639  |
| TET2   | 0.06 | nonsynonymous SNV    | 4   | 105236698 | 105236698 |
| TET2   | 0.15 | nonsynonymous SNV    | 4   | 105243612 | 105243612 |
| TET2   | 0.43 | frameshift deletion  | 4   | 105243778 | 105243781 |
| TET2   | 0.39 | nonsynonymous SNV    | 4   | 105275613 | 105275613 |
| RAD21  | 0.09 | nonsynonymous SNV    | 8   | 116857362 | 116857362 |
| NOTCH1 | 0.07 | nonsynonymous SNV    | 9   | 136496655 | 136496655 |
| SMC1A  | 0.09 | nonsynonymous SNV    | X   | 53413242  | 53413242  |

C3D1 Treated ("Rain4")

| GENE   | AF   | TYPE              | CHR | START     | END       |
|--------|------|-------------------|-----|-----------|-----------|
| SF3B1  | 0.33 | nonsynonymous SNV | 2   | 197402649 | 197402649 |
| ASXL1  | 0.33 | nonsynonymous SNV | 20  | 32435156  | 32435156  |
| TET2   | 0.16 | nonsynonymous SNV | 4   | 105243612 | 105243612 |
| JAK2   | 0.33 | nonsynonymous SNV | 9   | 5073770   | 5073770   |
| BCORL1 | 0.06 | nonsynonymous SNV | X   | 130014637 | 130014637 |

*Changes in AF of mutations in both samples:*

TET2: increase AF by 0.01 after treatment

*Differences:*

Lost KMT2A, KRAS, ASXL1 (x3), TET2 (x3), RAD21, NOTCH1, and SMC1A mutations after treatment.

Gain SF3B1, ASXL1, JAK2, and BCORL1 nonsynonymous SNV mutations after treatment.

## Raindance Paired VAF Analysis

KB-8-001 (103-004)

Screening ("RainF")

| GENE   | AF   | TYPE                | CHR | START     | END       |
|--------|------|---------------------|-----|-----------|-----------|
| KMT2A  | 0.06 | nonsynonymous SNV   | 11  | 118472267 | 118472267 |
| TP53   | 0.48 | nonsynonymous SNV   | 17  | 7676225   | 7676225   |
| ASXL1  | 0.26 | nonsynonymous SNV   | 20  | 32435156  | 32435156  |
| TET2   | 0.24 | frameshift deletion | 4   | 105236165 | 105236165 |
| TET2   | 0.31 | frameshift deletion | 4   | 105243705 | 105243706 |
| BCORL1 | 0.07 | nonsynonymous SNV   | X   | 130014637 | 130014637 |

C3D1 Treated ("Rain7")

| GENE   | AF   | TYPE                | CHR | START     | END       |
|--------|------|---------------------|-----|-----------|-----------|
| TP53   | 0.47 | nonsynonymous SNV   | 17  | 7676225   | 7676225   |
| TET2   | 0.23 | frameshift deletion | 4   | 105236165 | 105236165 |
| TET2   | 0.28 | frameshift deletion | 4   | 105243705 | 105243706 |
| NOTCH1 | 0.06 | nonsynonymous SNV   | 9   | 136496655 | 136496655 |

*Changes in AF of mutations in both samples:*

TP53: decrease AF by 0.01 after treatment

TET2 (FSD [I]): decrease AF by 0.01 after treatment

TET2 (FSD [II]): decrease AF by 0.03 after treatment

*Differences:*

Lost KMT2A, ASXL1, and BCORL1 nonsynonymous SNV mutations after treatment.

Gain NOTCH1 nonsynonymous SNV mutation after treatment.

## Raindance Paired VAF Analysis

**KB-13-001 (103-010)**

*Screening ("3")*

| GENE   | AF   | TYPE                | CHR | START     | END       |
|--------|------|---------------------|-----|-----------|-----------|
| NRAS   | 0.47 | nonsynonymous SNV   | 1   | 114716126 | 114716126 |
| ETV6   | 0.26 | nonsynonymous SNV   | 12  | 11869562  | 11869562  |
| ASXL1  | 0.45 | frameshift deletion | 20  | 32434807  | 32434807  |
| ASXL1  | 0.21 | nonsynonymous SNV   | 20  | 32435156  | 32435156  |
| GATA2  | 0.10 | nonsynonymous SNV   | 3   | 128486911 | 128486911 |
| TET2   | 0.79 | stopgain            | 4   | 105275056 | 105275056 |
| NOTCH1 | 0.50 | nonsynonymous SNV   | 9   | 136502383 | 136502383 |
| SMC1A  | 0.10 | nonsynonymous SNV   | X   | 53413242  | 53413242  |

*C3D1 Treated ("Rain11")*

| GENE  | AF   | TYPE                | CHR | START     | END       |
|-------|------|---------------------|-----|-----------|-----------|
| NRAS  | 0.43 | nonsynonymous SNV   | 1   | 114716126 | 114716126 |
| KMT2A | 0.08 | nonsynonymous SNV   | 11  | 118472267 | 118472267 |
| ETV6  | 0.41 | nonsynonymous SNV   | 12  | 11869562  | 11869562  |
| ASXL1 | 0.45 | frameshift deletion | 20  | 32434807  | 32434807  |
| ASXL1 | 0.46 | nonsynonymous SNV   | 20  | 32435156  | 32435156  |
| TET2  | 0.84 | stopgain            | 4   | 105275056 | 105275056 |

*Changes in AF of mutations in both samples:*

NRAS: decrease AF by 0.04 after treatment

ETV6: increase AF by 0.15 after treatment

ASXL1 (FSD): no change in AF after treatment

ASXL1 (NS): increase AF by 0.25 after treatment

TET2: increase AF by 0.05 after treatment

*Differences:*

Lost GATA2, NOTCH1, and SMC1A nonsynonymous SNV mutations after treatment.

Gain KMT2A nonsynonymous SNV mutation after treatment.

## Raindance Paired VAF Analysis

KB-14-001 (103-011)

Screening ("11")

| GENE   | AF   | TYPE                   | CHR | START     | END       |
|--------|------|------------------------|-----|-----------|-----------|
| NRAS   | 0.34 | nonsynonymous SNV      | 1   | 114716126 | 114716126 |
| KMT2A  | 0.08 | nonsynonymous SNV      | 11  | 118472267 | 118472267 |
| CEBPA  | 0.12 | nonframeshift deletion | 19  | 33302102  | 33302104  |
| ASXL1  | 0.13 | frameshift deletion    | 20  | 32434600  | 32434622  |
| RUNX1  | 0.30 | frameshift insertion   | 21  | 34792405  | 34792405  |
| TET2   | 0.47 | nonsynonymous SNV      | 4   | 105241408 | 105241408 |
| TET2   | 0.44 | stopgain               | 4   | 105275312 | 105275312 |
| EZH2   | 0.98 | nonsynonymous SNV      | 7   | 148846579 | 148846579 |
| JAK2   | 0.80 | nonsynonymous SNV      | 9   | 5073770   | 5073770   |
| NOTCH1 | 0.06 | nonsynonymous SNV      | 9   | 136496655 | 136496655 |

C3D1 Treated ("Rain12")

| GENE   | AF   | TYPE                       | CHR | START     | END       |
|--------|------|----------------------------|-----|-----------|-----------|
| NRAS   | 0.33 | nonsynonymous SNV          | 1   | 114716126 | 114716126 |
| DNMT3A | 0.50 | nonframeshift substitution | 2   | 25246633  | 25246634  |
| ASXL1  | 0.32 | frameshift insertion       | 20  | 32434639  | 32434639  |
| ASXL1  | 0.43 | nonsynonymous SNV          | 20  | 32435156  | 32435156  |
| RUNX1  | 0.52 | frameshift insertion       | 21  | 34792405  | 34792405  |
| TET2   | 0.44 | nonsynonymous SNV          | 4   | 105241408 | 105241408 |
| EZH2   | 0.98 | nonsynonymous SNV          | 7   | 148846579 | 148846579 |
| NOTCH1 | 0.06 | nonsynonymous SNV          | 9   | 136496646 | 136496646 |
| NOTCH1 | 0.06 | nonsynonymous SNV          | 9   | 136496655 | 136496655 |

*Changes in AF of mutations in both samples:*

NRAS: decrease AF by 0.01 after treatment

RUNX1: increase AF by 0.22 after treatment

TET2: decrease AF by 0.03 after treatment

NOTCH1: no change after treatment

*Differences:*

Lost KMT2A, CEBPA, ASXL1, TET2, EZH2, and JAK2 mutations after treatment.

Gain DNMT3A, ASXL1 (x2), EZH2, and NOTCH1 mutations after treatment.

## Raindance Paired VAF Analysis

### SINGLE TIMEPOINT SAMPLES SCREENING

#### KB-3-001 (101-003) – Non-Responder (“RainB”)

| GENE  | AF   | TYPE                | CHR | START    | END      |
|-------|------|---------------------|-----|----------|----------|
| TP53  | 0.08 | nonsynonymous SNV   | 17  | 7676193  | 7676193  |
| ASXL1 | 0.37 | frameshift deletion | 20  | 32434822 | 32434822 |

#### KB-11-001 (103-008) – Non-Responder (“RainH”)

| GENE  | AF   | TYPE              | CHR | START     | END       |
|-------|------|-------------------|-----|-----------|-----------|
| NRAS  | 0.06 | nonsynonymous SNV | 1   | 114716126 | 114716126 |
| IDH2  | 0.47 | nonsynonymous SNV | 15  | 90088702  | 90088702  |
| TP53  | 0.07 | nonsynonymous SNV | 17  | 7676193   | 7676193   |
| GATA2 | 0.46 | nonsynonymous SNV | 3   | 128486117 | 128486117 |

#### KB-15-001 (103-012) – Non-Responder (“13”)

| GENE   | AF   | TYPE                 | CHR | START     | END       |
|--------|------|----------------------|-----|-----------|-----------|
| CSF3R  | 0.44 | nonsynonymous SNV    | 1   | 36466862  | 36466862  |
| CBL    | 0.65 | nonsynonymous SNV    | 11  | 119278541 | 119278541 |
| SETBP1 | 0.48 | nonsynonymous SNV    | 18  | 44951942  | 44951942  |
| ASXL1  | 0.46 | stopgain             | 20  | 32434485  | 32434485  |
| ASXL1  | 0.15 | frameshift deletion  | 20  | 32434600  | 32434622  |
| ASXL1  | 0.20 | nonsynonymous SNV    | 20  | 32435156  | 32435156  |
| TET2   | 0.44 | stopgain             | 4   | 105234282 | 105234282 |
| TET2   | 0.21 | frameshift insertion | 4   | 105275524 | 105275524 |
| NOTCH1 | 0.09 | nonsynonymous SNV    | 9   | 136496655 | 136496655 |

#### KB-17-001 (103-002) – Non-Responder (“RainD”)

| GENE   | AF   | TYPE                | CHR | START     | END       |
|--------|------|---------------------|-----|-----------|-----------|
| IDH2   | 0.46 | nonsynonymous SNV   | 15  | 90088702  | 90088702  |
| ASXL1  | 0.35 | nonsynonymous SNV   | 20  | 32435156  | 32435156  |
| ASXL1  | 0.25 | frameshift deletion | 20  | 32435578  | 32435581  |
| JAK2   | 0.18 | nonsynonymous SNV   | 9   | 5073770   | 5073770   |
| BCORL1 | 0.07 | nonsynonymous SNV   | X   | 130014637 | 130014637 |

## Raindance Paired VAF Analysis

**KB-16-001 (103-013) – Non-Responder (“14”)**

| GENE   | AF   | TYPE                 | CHR | START     | END       |
|--------|------|----------------------|-----|-----------|-----------|
| KMT2A  | 0.10 | nonsynonymous SNV    | 11  | 118472267 | 118472267 |
| KMT2A  | 0.07 | nonsynonymous SNV    | 11  | 118503264 | 118503264 |
| CBL    | 0.51 | nonsynonymous SNV    | 11  | 119278268 | 119278268 |
| ASXL1  | 0.44 | nonsynonymous SNV    | 20  | 32431326  | 32431326  |
| ASXL1  | 0.40 | frameshift insertion | 20  | 32434639  | 32434639  |
| ASXL1  | 0.14 | nonsynonymous SNV    | 20  | 32435156  | 32435156  |
| RUNX1  | 0.32 | frameshift insertion | 21  | 34792566  | 34792566  |
| GATA2  | 0.39 | nonsynonymous SNV    | 3   | 128486911 | 128486911 |
| TET2   | 0.43 | stopgain             | 4   | 105235468 | 105235468 |
| TET2   | 0.24 | nonsynonymous SNV    | 4   | 105237193 | 105237193 |
| TET2   | 0.39 | nonsynonymous SNV    | 4   | 105243631 | 105243631 |
| EZH2   | 0.35 | nonsynonymous SNV    | 7   | 148809351 | 148809351 |
| BCORL1 | 0.13 | nonsynonymous SNV    | X   | 130014637 | 130014637 |

### C3 TREATED

**KB-2-003 (101-002) – Non-Responder (“Rain2”)**

| GENE | AF   | TYPE                 | CHR | START     | END       |
|------|------|----------------------|-----|-----------|-----------|
| TET2 | 0.11 | frameshift insertion | 4   | 105242894 | 105242894 |
| TET2 | 0.11 | stopgain             | 4   | 105275464 | 105275464 |

**KB-9-002 (103-005) – Non-Responder (“Rain8”)**

| GENE | AF   | TYPE                 | CHR | START     | END       |
|------|------|----------------------|-----|-----------|-----------|
| TET2 | 0.51 | frameshift insertion | 4   | 105236000 | 105236000 |
| TET2 | 0.45 | stopgain             | 4   | 105243621 | 105243621 |

### OTHER PATIENT SAMPLES

**1-V-001 (“2”)**

| GENE   | AF   | TYPE              | CHR | START     | END       |
|--------|------|-------------------|-----|-----------|-----------|
| KMT2A  | 0.17 | nonsynonymous SNV | 11  | 118472267 | 118472267 |
| CBL    | 0.52 | nonsynonymous SNV | 11  | 119278541 | 119278541 |
| ASXL1  | 0.06 | nonsynonymous SNV | 20  | 32433455  | 32433455  |
| ASXL1  | 0.06 | nonsynonymous SNV | 20  | 32433457  | 32433457  |
| SMC1A  | 0.13 | nonsynonymous SNV | X   | 53413242  | 53413242  |
| BCORL1 | 0.98 | nonsynonymous SNV | X   | 130015441 | 130015441 |

## Raindance Paired VAF Analysis

### 2-N-001 ("4")

| GENE  | AF   | TYPE                | CHR | START     | END       |
|-------|------|---------------------|-----|-----------|-----------|
| KMT2A | 0.14 | nonsynonymous SNV   | 11  | 118472267 | 118472267 |
| ETV6  | 0.17 | frameshift deletion | 12  | 11839271  | 11839272  |
| ETV6  | 0.21 | nonsynonymous SNV   | 12  | 11869562  | 11869562  |
| ASXL1 | 0.09 | stopgain            | 20  | 32433447  | 32433447  |
| ASXL1 | 0.08 | nonsynonymous SNV   | 20  | 32433455  | 32433455  |
| ASXL1 | 0.08 | nonsynonymous SNV   | 20  | 32433457  | 32433457  |
| ASXL1 | 0.32 | nonsynonymous SNV   | 20  | 32435156  | 32435156  |
| TET2  | 0.47 | nonsynonymous SNV   | 4   | 105236541 | 105236541 |
| TET2  | 0.38 | nonsynonymous SNV   | 4   | 105275677 | 105275677 |
| JAK2  | 1.00 | nonsynonymous SNV   | 9   | 5073770   | 5073770   |
| SMC1A | 0.39 | nonsynonymous SNV   | X   | 53422495  | 53422495  |

### 1-M-001 ("5")

| GENE  | AF   | TYPE                   | CHR | START     | END       |
|-------|------|------------------------|-----|-----------|-----------|
| KMT2A | 0.12 | nonsynonymous SNV      | 11  | 118472267 | 118472267 |
| KMT2A | 0.08 | nonsynonymous SNV      | 11  | 118503264 | 118503264 |
| CEBPA | 0.09 | nonframeshift deletion | 19  | 33302102  | 33302104  |
| ASXL1 | 0.18 | nonsynonymous SNV      | 20  | 32435156  | 32435156  |
| TET2  | 0.27 | frameshift deletion    | 4   | 105243705 | 105243706 |
| TET2  | 0.33 | stopgain               | 4   | 105259687 | 105259687 |

### 2-F-001 ("6")

| GENE   | AF   | TYPE                 | CHR | START     | END       |
|--------|------|----------------------|-----|-----------|-----------|
| SMC3   | 0.34 | nonsynonymous SNV    | 10  | 110602030 | 110602030 |
| ETV6   | 0.15 | frameshift deletion  | 12  | 11839271  | 11839272  |
| ETV6   | 0.17 | nonsynonymous SNV    | 12  | 11869562  | 11869562  |
| MAP2K1 | 0.08 | nonsynonymous SNV    | 15  | 66435113  | 66435113  |
| ASXL1  | 0.10 | nonsynonymous SNV    | 20  | 32433455  | 32433455  |
| ASXL1  | 0.10 | nonsynonymous SNV    | 20  | 32433457  | 32433457  |
| ASXL1  | 0.11 | nonsynonymous SNV    | 20  | 32435156  | 32435156  |
| TET2   | 0.46 | nonsynonymous SNV    | 4   | 105236541 | 105236541 |
| TET2   | 0.48 | frameshift insertion | 4   | 105275086 | 105275086 |
| TET2   | 0.36 | nonsynonymous SNV    | 4   | 105275677 | 105275677 |
| EZH2   | 0.07 | nonsynonymous SNV    | 7   | 148817266 | 148817266 |
| JAK2   | 1.00 | nonsynonymous SNV    | 9   | 5073770   | 5073770   |
| SMC1A  | 0.45 | nonsynonymous SNV    | X   | 53422495  | 53422495  |
| BCORL1 | 0.06 | nonsynonymous SNV    | X   | 130014637 | 130014637 |
| BCORL1 | 0.36 | frameshift deletion  | X   | 130056036 | 130056036 |



## Raindance Paired VAF Analysis

### 1-N-001 ("7")

| GENE   | AF   | TYPE                 | CHR | START     | END       |
|--------|------|----------------------|-----|-----------|-----------|
| NRAS   | 0.13 | nonsynonymous SNV    | 1   | 114716123 | 114716123 |
| NRAS   | 0.17 | nonsynonymous SNV    | 1   | 114716126 | 114716126 |
| KMT2A  | 0.20 | nonsynonymous SNV    | 11  | 118472267 | 118472267 |
| KMT2A  | 0.06 | frameshift deletion  | 11  | 118472296 | 118472296 |
| SETBP1 | 0.50 | nonsynonymous SNV    | 18  | 44951948  | 44951948  |
| ASXL1  | 0.48 | frameshift insertion | 20  | 32434639  | 32434639  |

### 3-A-001 ("9")

| GENE   | AF   | TYPE                 | CHR | START     | END       |
|--------|------|----------------------|-----|-----------|-----------|
| KRAS   | 0.46 | nonsynonymous SNV    | 12  | 25245350  | 25245350  |
| SETBP1 | 0.44 | nonsynonymous SNV    | 18  | 44951946  | 44951946  |
| ASXL1  | 0.06 | nonsynonymous SNV    | 20  | 32433455  | 32433455  |
| ASXL1  | 0.06 | nonsynonymous SNV    | 20  | 32433457  | 32433457  |
| ASXL1  | 0.18 | nonsynonymous SNV    | 20  | 32435156  | 32435156  |
| ASXL1  | 0.09 | frameshift deletion  | 20  | 32435315  | 32435315  |
| TET2   | 0.15 | frameshift deletion  | 4   | 105237059 | 105237059 |
| TET2   | 0.21 | frameshift insertion | 4   | 105275524 | 105275524 |
| SMC1A  | 0.10 | nonsynonymous SNV    | X   | 53413242  | 53413242  |

### 1-T-001 ("Rain13")

| GENE   | AF   | TYPE                   | CHR | START     | END       |
|--------|------|------------------------|-----|-----------|-----------|
| IDH2   | 0.40 | nonsynonymous SNV      | 15  | 90088702  | 90088702  |
| TET2   | 0.37 | nonsynonymous SNV      | 4   | 105243759 | 105243759 |
| JAK2   | 0.37 | nonsynonymous SNV      | 9   | 5073770   | 5073770   |
| NOTCH1 | 0.07 | nonframeshift deletion | 9   | 136496493 | 136496495 |
| NOTCH1 | 0.09 | nonsynonymous SNV      | 9   | 136496655 | 136496655 |

## Raindance Paired VAF Analysis

### OTHER SAMPLES (LISTED BY RAINDANCE ID)

#### Rain422

None meet Markus' cutoffs/filtering (however the "all" file contains more mutations)

#### Rain518

| GENE  | AF   | TYPE              | CHR | START    | END      |
|-------|------|-------------------|-----|----------|----------|
| KRAS  | 0.12 | nonsynonymous SNV | 12  | 25245286 | 25245286 |
| KRAS  | 0.34 | nonsynonymous SNV | 12  | 25245347 | 25245347 |
| KDM6A | 0.09 | nonsynonymous SNV | X   | 45069826 | 45069826 |
| KDM6A | 0.07 | nonsynonymous SNV | X   | 45069854 | 45069854 |
| KDM6A | 0.06 | nonsynonymous SNV | X   | 45069915 | 45069915 |
| KDM6A | 0.06 | nonsynonymous SNV | X   | 45069919 | 45069919 |

#### Rain520

| GENE   | AF   | TYPE              | CHR | START     | END       |
|--------|------|-------------------|-----|-----------|-----------|
| KRAS   | 0.09 | nonsynonymous SNV | 12  | 25245286  | 25245286  |
| KRAS   | 0.33 | nonsynonymous SNV | 12  | 25245347  | 25245347  |
| SMC1A  | 0.06 | nonsynonymous SNV | X   | 53413242  | 53413242  |
| BCORL1 | 0.08 | nonsynonymous SNV | X   | 130014637 | 130014637 |

#### Rain522

| GENE   | AF   | TYPE                   | CHR | START     | END       |
|--------|------|------------------------|-----|-----------|-----------|
| KMT2A  | 0.10 | nonsynonymous SNV      | 11  | 118472267 | 118472267 |
| KRAS   | 0.33 | nonsynonymous SNV      | 12  | 25245347  | 25245347  |
| CEBPA  | 0.08 | nonframeshift deletion | 19  | 33302102  | 33302104  |
| ASXL1  | 0.39 | nonsynonymous SNV      | 20  | 32435156  | 32435156  |
| RUNX1  | 0.08 | nonsynonymous SNV      | 21  | 34886895  | 34886895  |
| BCORL1 | 0.08 | nonsynonymous SNV      | X   | 130014637 | 130014637 |

### Human in Mouse Samples

#### 16

| GENE   | AF   | TYPE              | CHR | START     | END       |
|--------|------|-------------------|-----|-----------|-----------|
| DNMT3A | 0.18 | stopgain          | 2   | 25244203  | 25244203  |
| BCORL1 | 0.13 | nonsynonymous SNV | X   | 130014637 | 130014637 |

#### 17

None meet Markus' cutoffs/filtering

## Raindance Paired VAF Analysis

18

None meet Markus' cutoffs/filtering

19

| GENE   | AF   | TYPE              | CHR | START     | END       |
|--------|------|-------------------|-----|-----------|-----------|
| RAD21  | 0.09 | nonsynonymous SNV | 8   | 116847685 | 116847685 |
| NOTCH1 | 0.35 | nonsynonymous SNV | 9   | 136496655 | 136496655 |
| BCOR   | 0.09 | nonsynonymous SNV | X   | 40052348  | 40052348  |

20

| GENE   | AF   | TYPE                | CHR | START     | END       |
|--------|------|---------------------|-----|-----------|-----------|
| MAP2K1 | 0.08 | nonsynonymous SNV   | 15  | 66435113  | 66435113  |
| ASXL1  | 0.06 | nonsynonymous SNV   | 20  | 32433455  | 32433455  |
| ASXL1  | 0.33 | nonsynonymous SNV   | 20  | 32435156  | 32435156  |
| TET2   | 0.10 | frameshift deletion | 4   | 105237120 | 105237120 |
| NOTCH1 | 0.14 | nonsynonymous SNV   | 9   | 136496655 | 136496655 |
| SMC1A  | 0.10 | nonsynonymous SNV   | X   | 53413242  | 53413242  |

21

| GENE   | AF   | TYPE                 | CHR | START     | END       |
|--------|------|----------------------|-----|-----------|-----------|
| KRAS   | 0.18 | nonsynonymous SNV    | 12  | 25245348  | 25245348  |
| MAP2K1 | 0.08 | nonsynonymous SNV    | 15  | 66435113  | 66435113  |
| ASXL1  | 0.09 | nonsynonymous SNV    | 20  | 32433455  | 32433455  |
| ASXL1  | 0.09 | nonsynonymous SNV    | 20  | 32433457  | 32433457  |
| ASXL1  | 0.25 | frameshift insertion | 20  | 32434639  | 32434639  |
| ASXL1  | 0.28 | nonsynonymous SNV    | 20  | 32435156  | 32435156  |
| NOTCH1 | 0.12 | nonsynonymous SNV    | 9   | 136496655 | 136496655 |
| SMC1A  | 0.10 | nonsynonymous SNV    | X   | 53413242  | 53413242  |
| BCORL1 | 0.11 | nonsynonymous SNV    | X   | 130014637 | 130014637 |

22

| GENE   | AF   | TYPE                       | CHR | START     | END       |
|--------|------|----------------------------|-----|-----------|-----------|
| MAP2K1 | 0.07 | nonsynonymous SNV          | 15  | 66435113  | 66435113  |
| ASXL1  | 0.09 | nonsynonymous SNV          | 20  | 32433455  | 32433455  |
| ASXL1  | 0.09 | nonsynonymous SNV          | 20  | 32433457  | 32433457  |
| ASXL1  | 0.20 | nonsynonymous SNV          | 20  | 32435156  | 32435156  |
| NOTCH1 | 0.07 | nonframeshift deletion     | 9   | 136496493 | 136496495 |
| SMC1A  | 0.09 | nonframeshift substitution | X   | 53413242  | 53413243  |

## Raindance Paired VAF Analysis

23

| GENE   | AF   | TYPE                 | CHR | START     | END       |
|--------|------|----------------------|-----|-----------|-----------|
| KMT2A  | 0.11 | nonsynonymous SNV    | 11  | 118472267 | 118472267 |
| ETV6   | 0.18 | frameshift deletion  | 12  | 11839271  | 11839272  |
| ETV6   | 0.14 | nonsynonymous SNV    | 12  | 11869562  | 11869562  |
| PTPN11 | 0.21 | nonsynonymous SNV    | 12  | 112450393 | 112450393 |
| ASXL1  | 0.46 | frameshift insertion | 20  | 32434639  | 32434639  |
| ASXL1  | 0.32 | nonsynonymous SNV    | 20  | 32435156  | 32435156  |
| TET2   | 0.07 | nonsynonymous SNV    | 4   | 105236698 | 105236698 |
| TET2   | 0.13 | nonsynonymous SNV    | 4   | 105275677 | 105275677 |
| RAD21  | 0.39 | stopgain             | 8   | 116866721 | 116866721 |
| NOTCH1 | 0.08 | nonsynonymous SNV    | 9   | 136496655 | 136496655 |

24

| GENE   | AF   | TYPE                | CHR | START     | END       |
|--------|------|---------------------|-----|-----------|-----------|
| KMT2A  | 0.10 | nonsynonymous SNV   | 11  | 118472267 | 118472267 |
| ETV6   | 0.21 | frameshift deletion | 12  | 11839271  | 11839272  |
| ETV6   | 0.23 | nonsynonymous SNV   | 12  | 11869562  | 11869562  |
| PTPN11 | 0.18 | nonsynonymous SNV   | 12  | 112450393 | 112450393 |
| SF3B1  | 0.32 | nonsynonymous SNV   | 2   | 197402649 | 197402649 |
| ASXL1  | 0.08 | nonsynonymous SNV   | 20  | 32433455  | 32433455  |
| ASXL1  | 0.08 | nonsynonymous SNV   | 20  | 32433457  | 32433457  |
| TET2   | 0.10 | nonsynonymous SNV   | 4   | 105275677 | 105275677 |
| JAK2   | 0.28 | nonsynonymous SNV   | 9   | 5073770   | 5073770   |
| NOTCH1 | 0.06 | nonsynonymous SNV   | 9   | 136496655 | 136496655 |
| SMC1A  | 0.06 | nonsynonymous SNV   | X   | 53413242  | 53413242  |
| BCORL1 | 0.08 | nonsynonymous SNV   | X   | 130014637 | 130014637 |

# Raindance Paired VAF Analysis

## ADDITIONAL INFORMATION

Analysis files located in /share/lab\_padron/Meghan/TargetedPanel/Hannah-Raindance-2019/results and each Raindance ID is a folder with all the analysis. Raindance IDs are matched to D-IDs and indicated in parentheses. Within a Raindance ID folder > GATK has the raw VCF file with the suffix “-haplo.vcf.gz”. Filtered and annotated SNPs are identified in “final” files.

Filters applied to VCF:

depth > 100

SOR < 3

QUAL > 100

AF > 0.05

Suffix “att9” has only the first three filters (i.e. does not apply the allelic frequency cutoff) and “att10” has all the filters applied. Above compiled VAF information is given based on “att10” results. These filters were the same ones applied by Markus to Andrew Kuykendall’s targeted panel.

## Supplemental Figure 4

COLONY FORMATION ASSAYS FOR 1 RESPONDER AND 2 NONRESPONDERS IN DUPLICATE

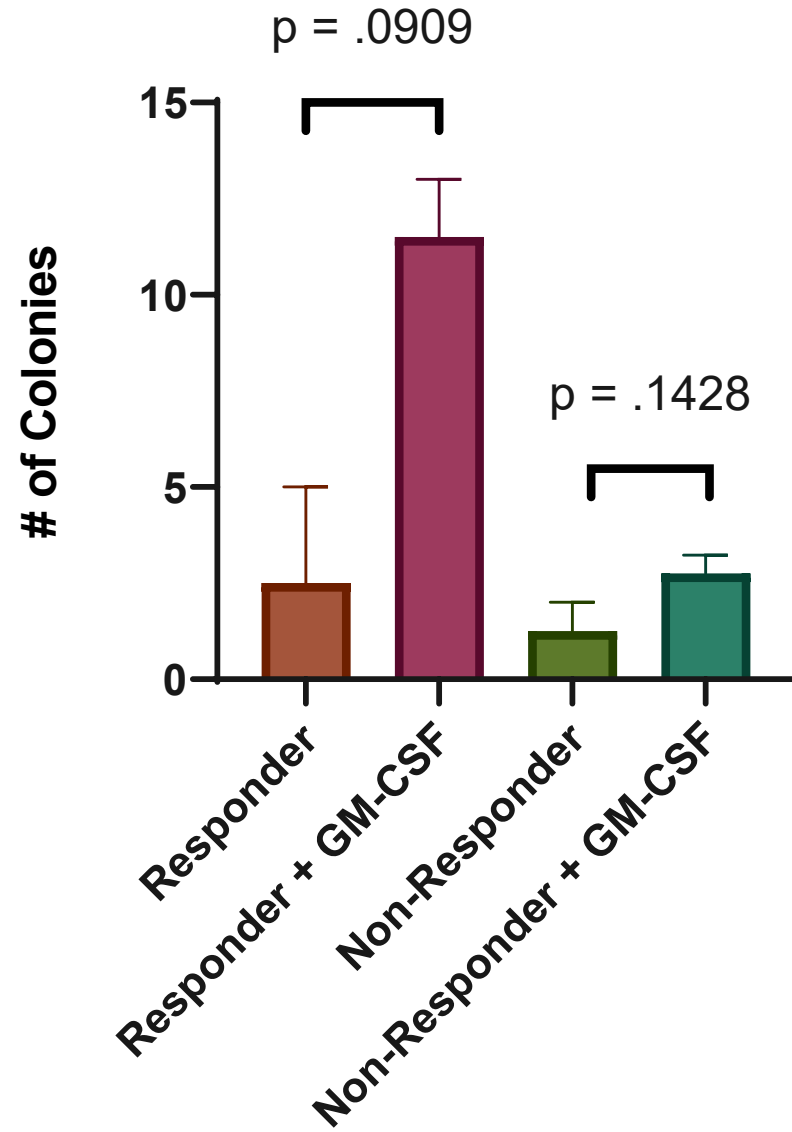

## Supplemental Figure 5a

BONE MARROW(BM) AND SPLEEN (SP) HUMAN CD45% ENGRAFTMENT OF KB-003 SCREENING PATIENT SAMPLES - MORIBUND

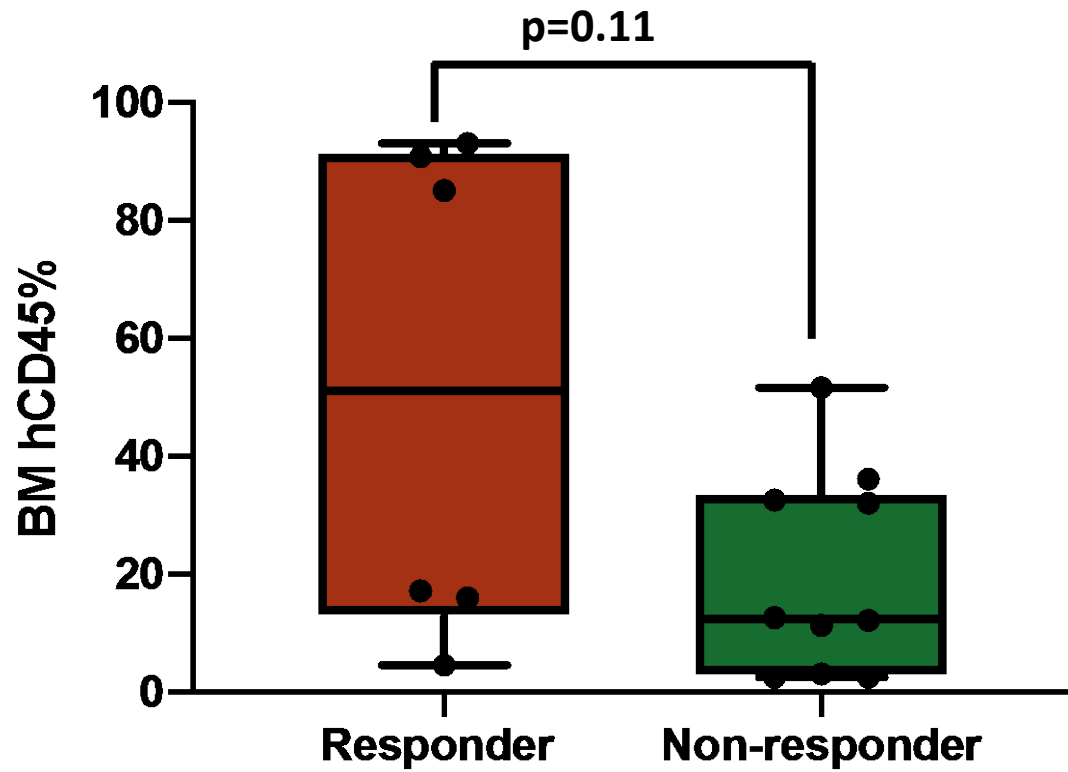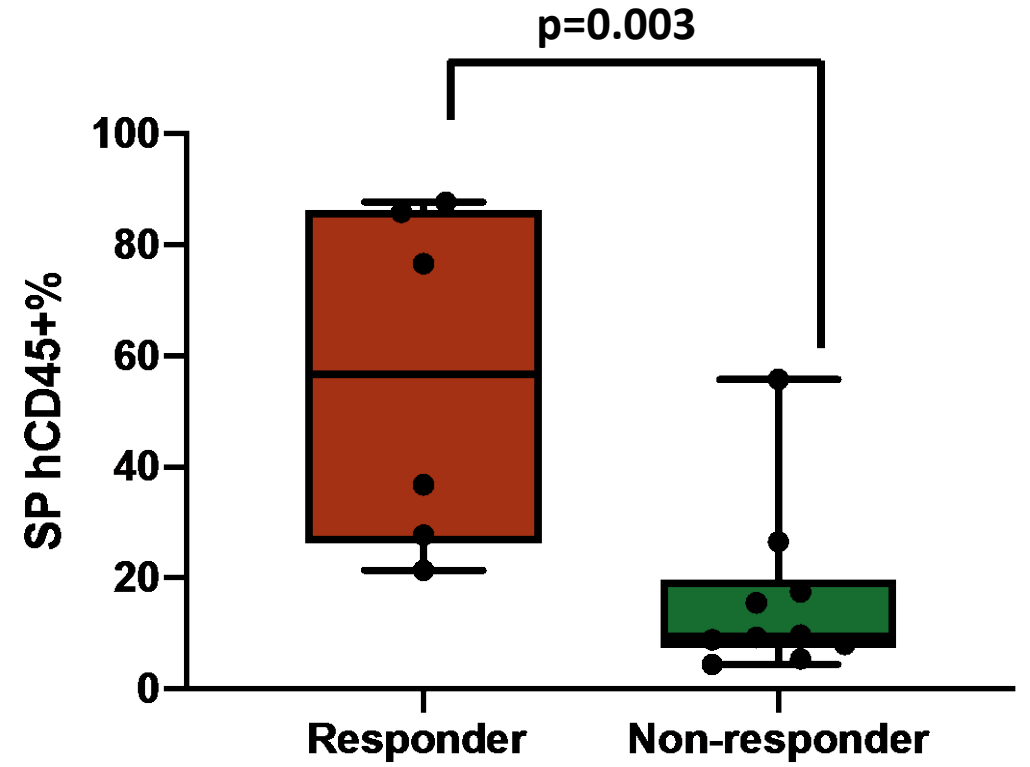

## Supplemental Figure 5b

SPLEEN WEIGHTS OF KB-003 SCREENING PATIENT SAMPLES -MORIBUND

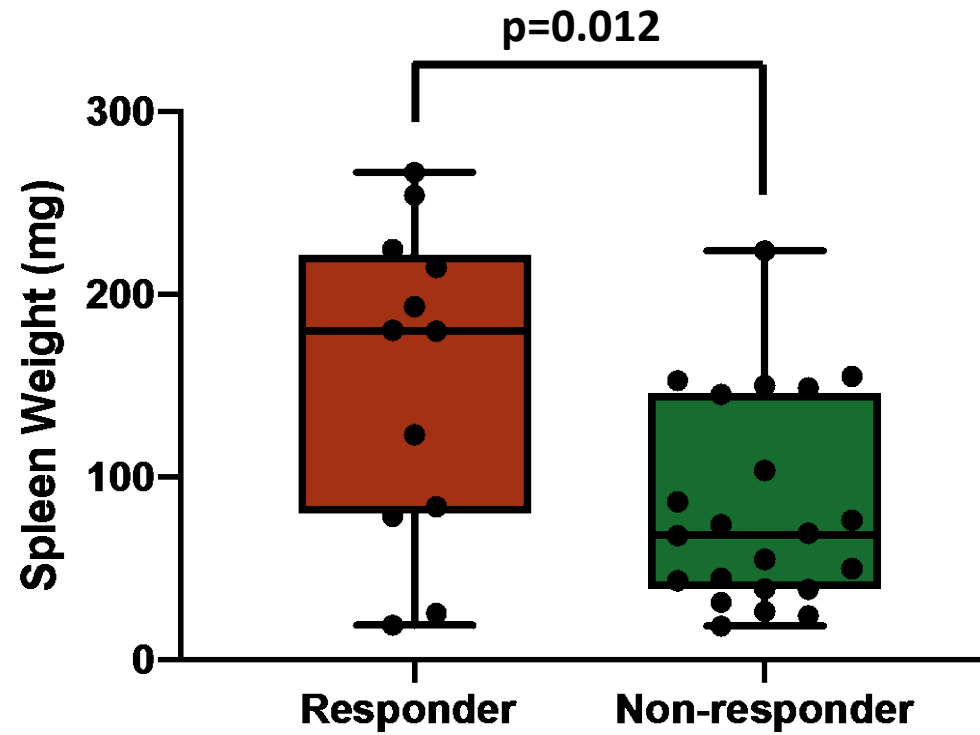

Supplement: bloodBLD2019004352-suppl1.pdf [file bloodBLD2019004352-suppl1.pdf]
